# Supplementary material for: Targeting intracellular p-aminobenzoic acid production potentiates the anti-tubercular action of antifolates
Source: PubMed Central journal article supplement (PMC5131483; doi:10.1038/srep38083), 2016-12-01
Supplement: srep38083-s1.pdf [file srep38083-s1.pdf]

**Title:** Targeting intracellular *p*-aminobenzoic acid production potentiates the anti-tubercular action of antifolates

**Authors:**

Joshua M. Thiede<sup>1,a</sup>, Shannon L. Kordus<sup>1,a</sup>, Breanna J. Turman<sup>1</sup>, Joseph A. Buonomo<sup>2</sup>, Courtney C. Aldrich<sup>2</sup>, Yusuke Minato<sup>1\*</sup> and Anthony D. Baughn<sup>1\*</sup>

**Author affiliations:**

<sup>1</sup>Department of Microbiology and Immunology, University of Minnesota Medical School, Minneapolis, MN. [WUUC0](#)

<sup>2</sup>Department of Medicinal Chemistry, University of Minnesota, Minneapolis, MN. [WUUC0](#)

<sup>a</sup>denotes equal author contribution

\*denotes corresponding author [C0F0D"cdcw j pB wo p0f w \[ 00{o kpcvqB wo p0f w](#)

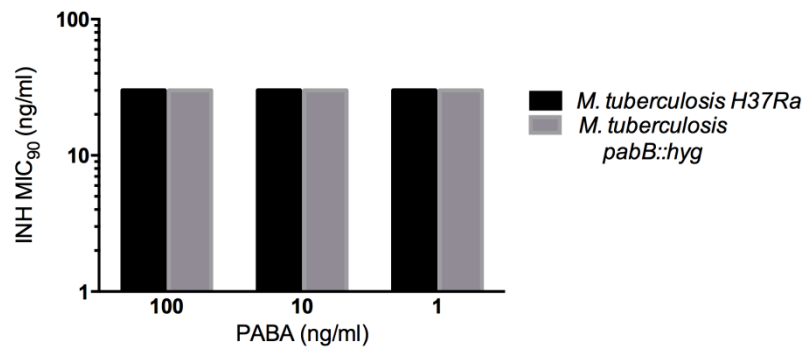

**Figure S1. Disruption of PABA biosynthesis does not alter isoniazid susceptibility in *M. tuberculosis*.** *M. tuberculosis* strains H37Ra and *pabB::hyg* were grown in supplemented 7H9 medium containing 1, 10, or 100 ng/ml of PABA. The minimum concentration of isoniazid required to inhibit 90% of growth relative to the no drug control culture (MIC<sub>90</sub>) was determined by measuring OD<sub>600</sub> after 10 days of incubation. Data biological s

Table S1. Bacterial strains used in this study.

| Strain                                                 | Relevant Features                                                                                                                             | Source     |
|--------------------------------------------------------|-----------------------------------------------------------------------------------------------------------------------------------------------|------------|
| <i>M. tuberculosis</i> mc <sup>2</sup> 7000            | <i>M. tuberculosis</i> H <sub>37</sub> Rv $\Delta$ RD1 $\Delta$ panCD                                                                         | 1          |
| <i>M. tuberculosis</i> pabC::Tn                        | <i>M. tuberculosis</i> mc <sup>2</sup> 7000 with a <i>magellan4</i> mini-transposon insertion in <i>pabC</i>                                  | This y qtm |
| <i>M. tuberculosis</i> pabC::Tn pJT6a::pabC            | <i>M. tuberculosis</i> mc <sup>2</sup> 7000 <i>pabC</i> ::Tn transformed with pJT6a- <i>pabC</i>                                              | This y qtm |
| <i>M. tuberculosis</i> H <sub>37</sub> Ra              | spontaneously attenuated derivative of <i>M. tuberculosis</i> H <sub>37</sub>                                                                 | 2          |
| <i>M. tuberculosis</i> pabB::hyg                       | <i>M. tuberculosis</i> H <sub>37</sub> Ra with <i>pabB</i> coding sequence replaced by a hygromycin resistance cassette                       | This y qtm |
| <i>M. tuberculosis</i> pabB::hyg pO X528/pabB          | <i>M. tuberculosis</i> H <sub>37</sub> Ra <i>pabB</i> ::hyg transformed with pO X528/pabB                                                     | This y qtm |
| <i>M. tuberculosis</i> folC <sub>E153A</sub>           | <i>M. tuberculosis</i> H <sub>37</sub> Ra with PAS resistance mutation in <i>folC</i> (153Glu --> Ala)                                        | 3          |
| <i>M. tuberculosis</i> folC <sub>E153A</sub> pabB::hyg | <i>M. tuberculosis</i> H <sub>37</sub> Ra folC <sub>E153A</sub> with <i>pabB</i> coding sequence replaced by a hygromycin resistance cassette | This y qtm |
| <i>E. coli</i> DH5 $\alpha$                            | <i>E. coli</i> strain used to propagate recombinant plasmids                                                                                  | 4          |

Table S2. Plasmids used in this study.

| <b>Name</b>         | <b>Relevant Features</b>                                                                                                                                  | <b>Source</b> |
|---------------------|-----------------------------------------------------------------------------------------------------------------------------------------------------------|---------------|
| pJT6a- <i>pabC</i>  | pJT6a containing the <i>M. tuberculosis</i> H <sub>37</sub> Rv <i>pabC</i> coding sequence under control of the P <sub>smyc1</sub> tetO promoter/operator | This work     |
| pMV306- <i>pabB</i> | pMV306 containing the <i>M. tuberculosis</i> H <sub>37</sub> Ra <i>pabB</i> promoter and coding sequence                                                  | This work     |
| p0004S              | Plasmid for construction of allelic exchange substrates                                                                                                   | 5             |
| phAE159             | Phasmid used to produce specialized transduction phage containing p0004S derived allelic exchange plasmids                                                | 6             |

Table S3. Oligonucleotide primers used in this study.

| Name         | Sequence                                                | Source    | Relevant Restriction Site |
|--------------|---------------------------------------------------------|-----------|---------------------------|
| pabB_F       | TTTTTT <u>CCATGG</u> ACG CCG AGC GTG CTT TTC CTA CT     | This work | <i>NcoI</i>               |
| pabB_R       | TTTTTT <u>AAGCTT</u> CTA CCG CAC TTT GCT GGC TAA CC     | This work | <i>HindIII</i>            |
| pabC_F       | TTTTTT <u>AAGCTT</u> ATG TTG AGG CAG ACG GGC GT         | This work | <i>HindIII</i>            |
| pabC_R       | TTTTTT <u>GAATTC</u> TCA CCG GTC GCT GAC AAT AGC        | This work | <i>EcoRI</i>              |
| pabB_Up_For  | TTTTTTTT <u>CCATAAATTGG</u> CTC GCA AAC TCG CGT CGT AGG | This work | <i>PflmI</i>              |
| pabB_Up_Rev  | TTTTTTTT <u>CCATTTCTTGG</u> GCA CCG GAC AGG CTC TCA TAC | This work | <i>PflmI</i>              |
| pabB_Dwn_For | TTTTTTTT <u>CCATAGATTGG</u> AGT GTG GCA CCT GGT GTC CAC | This work | <i>PflmI</i>              |
| pabB_Dwn_Rev | TTTTTTTT <u>CCATCTTTTGG</u> ACT CCA GCG CGT TAA CCG CAA | This work | <i>PflmI</i>              |

### Supplemental Method. Synthesis of MAC173979:

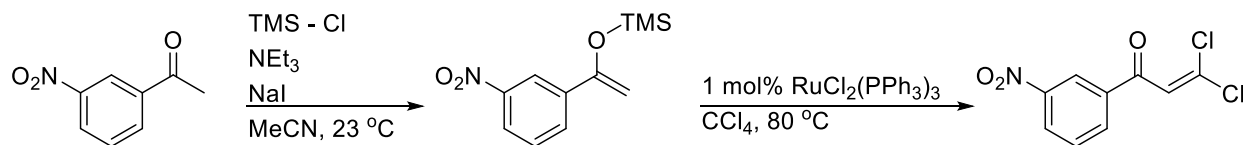

**3,3-Dichloro-1-(3-nitrophenyl)prop-2-en-1-one (MAC173979) Synthesis.** To a 25 mL round-bottom flask, equipped with a Teflon-coated magnetic stir bar, was added 3'-nitroacetophenone (991 mg, 6.0 mmol, 1.00 equiv.), trimethylsilyl chloride (0.951 mL, 7.5 mmol, 1.25 equiv.), and triethylamine (1.05 mL, 7.5 mmol, 1.25 equiv.). The mixture was stirred at 23 °C and a solution of sodium iodide (1.12 g, 7.5 mmol, 1.25 equiv.) in acetonitrile (7.5 mL, 1.0 M) was added dropwise, causing an exothermic reaction. After 30 min of stirring, the reaction was cooled to 0 °C, and cyclohexane (6 mL) was added. Then cold water (6 mL) was added and the layers were separated. The resultant aqueous layer was extracted with cyclohexane (2 × 6 mL). The combined organic layers were washed with cold H<sub>2</sub>O (2 × 6 mL) and dried with anhydrous MgSO<sub>4</sub>. The solvent was removed *in vacuo* to afford the intermediate trimethylsilyl enol ether as a yellow oil (1.21 g, 84%) that was used without further purification.

To a flame-dried 15 mL pressure tube, equipped with a Teflon-coated magnetic stir bar, was added CCl<sub>4</sub> (1.74 mL, 18.0 mmol, 3.60 equiv.) and the vessel was sealed with a silicon septum. The liquid was frozen at -78 °C and vacuum was applied to 0.3 mmHg. The solvent was then allowed to thaw under vacuum before the vessel was back-filled with argon. This freeze-pump-thaw process was repeated twice more. Ruthenium(II) tris-triphenylphosphine dichloride (57 mg, 0.05 mmol, 0.01 equiv.) and the trimethylsilyl enol ether prepared above (1.20 g, 5.00 mmol, 1.00 equiv.) were added under a blanket of argon. The vessel was sealed with a back-sealing screw cap, and then heated at 80 °C. After 17 h, the reaction was cooled to 23 °C, loaded directly onto a silica gel column (250 mL) and purified by flash chromatography (200 mL hexanes, followed by 80:20 hexanes–ethyl acetate). The title compound (857 mg, 70%) was collected as the first UV-active compound ( $R_f = 0.32$ , 80:20 hexanes–ethyl acetate) and separated from 3'-nitro-2,2,2-trichloroacetophenone ( $R_f = 0.30$ , 80:20 hexanes–ethyl acetate). The <sup>1</sup>H and <sup>13</sup>C NMR spectra matched previously published spectra.<sup>7</sup>

## Supplemental References

1. Ojha, A. K. *et al.* Growth of *Mycobacterium tuberculosis* biofilms containing free mycolic acids and harbouring drug-tolerant bacteria. *Mol. Microbiol.* **69**, 164–174 (2008).
2. Steenken, W. Lysis of tubercle bacilli *in vitro*. *Exp. Biol. Med.* **33**, 253–255 (1935).
3. Zhao, F. *et al.* Binding pocket alterations in dihydrofolate synthase confer resistance to para-aminosalicylic acid in clinical isolates of *Mycobacterium tuberculosis*. *Antimicrob. Agents Chemother.* **58**, 1479–87 (2014).
4. Taylor, R. G., Walker, D. C. & McInnes, R. R. *E. coli* host strains significantly affect the quality of small scale plasmid DNA preparations used for sequencing. *Nucleic Acids Res.* **21**, 1677–1678 (1993).
5. Baughn, A. D. *et al.* Mutually exclusive genotypes for pyrazinamide and 5-chloropyrazinamide resistance reveal a potential resistance-proofing strategy. *Antimicrob. Agents Chemother.* **54**, 5323–5328 (2010).
6. Bardarov, S. *et al.* Specialized transduction: an efficient method for generating marked and unmarked targeted gene disruptions in *Mycobacterium tuberculosis*, *M. bovis* BCG and *M. smegmatis*. *Microbiology* **148**, 3007–17 (2002).
7. Zlitni, S., Ferruccio, L. F. & Brown, E. D. Metabolic suppression identifies new antibacterial inhibitors under nutrient limitation. *Nat. Chem. Biol.* **9**, 796–804 (2013).
